# Supplementary material for: Modifying morphology and defects of low-dimensional, semi-transparent perovskite thin films via solvent type
Source: Royal Society of Chemistry journal article supplement (doi:10.1039/c9ra00971j), 2019-01-01
Supplement: c9ra00971j1.pdf [file c9ra00971j1.pdf]

## **Modifying morphology and defects of low-Dimensional, semi-transparent perovskite thin films *via* solvent type**

Jitprabhat Ponchai<sup>1</sup>, Paphada Kaewurai<sup>1</sup>, Chirapa Boonthum<sup>1</sup>, Kusuma Pinsuwan<sup>1</sup>, Thidarat Supasai<sup>2</sup>, Somboon Sahasithiwat<sup>3</sup>, Pongsakorn Kanjanaboos<sup>1,4\*</sup>

<sup>1</sup> *School of Materials Science and Innovation, Faculty of Science, Mahidol University, Bangkok 10400, Thailand.*

<sup>2</sup> *Department of Materials Science, Faculty of Science, Kasetsart University, Bangkok 10900, Thailand.*

<sup>3</sup> *National Metal and Materials Technology Center (MTEC), Pathum Thani 12120, Thailand.*

<sup>4</sup> *Center of Excellence for Innovation in Chemistry (PERCH-CIC), Office of Higher Education Commission, Ministry of Education (OHEC), Bangkok 10400, Thailand.*

*\*corresponding author email: Pongsakorn.kan@mahidol.edu*

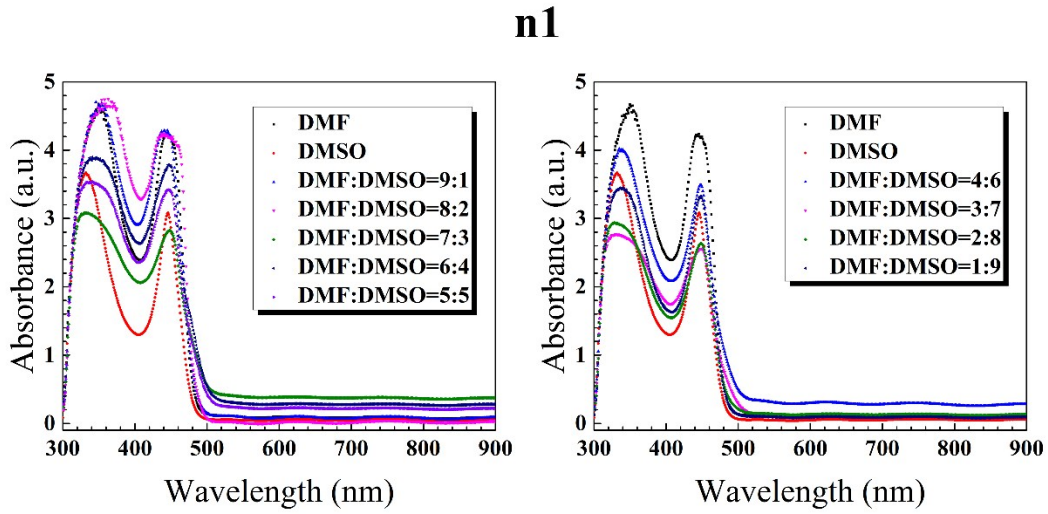

**Fig. S1.** UV absorption spectra of  $(\text{PEA})_2\text{PbI}_2\text{Br}_2$  films using different ratios of DMF and DMSO.

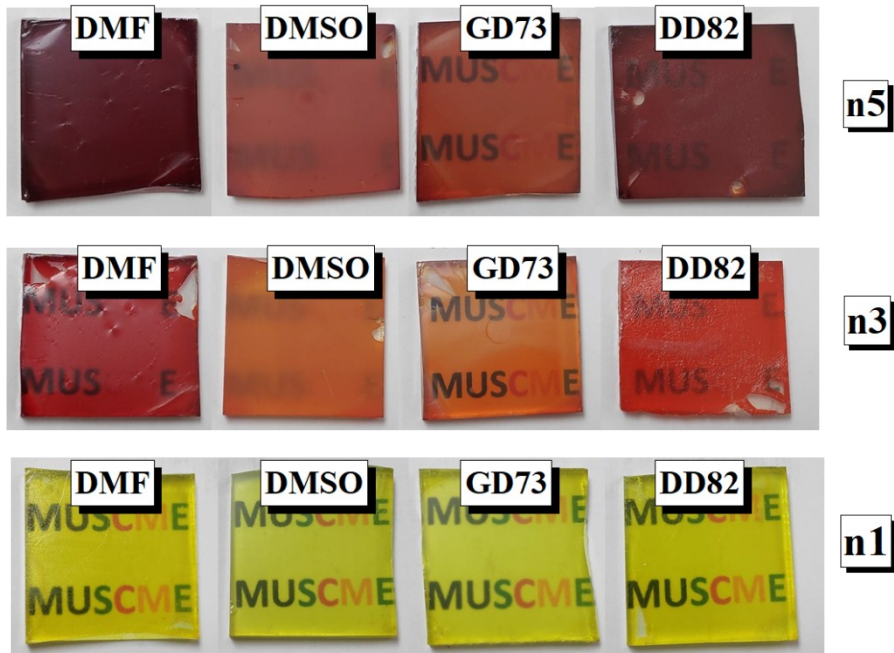

**Fig. S2.** The optical images of low dimensional mixed halide perovskite  $(\text{PEA})_2(\text{MA})_{n-1}\text{Pb}_n\text{I}_{n+1}\text{Br}_{2n}$  prepared in different solvents.

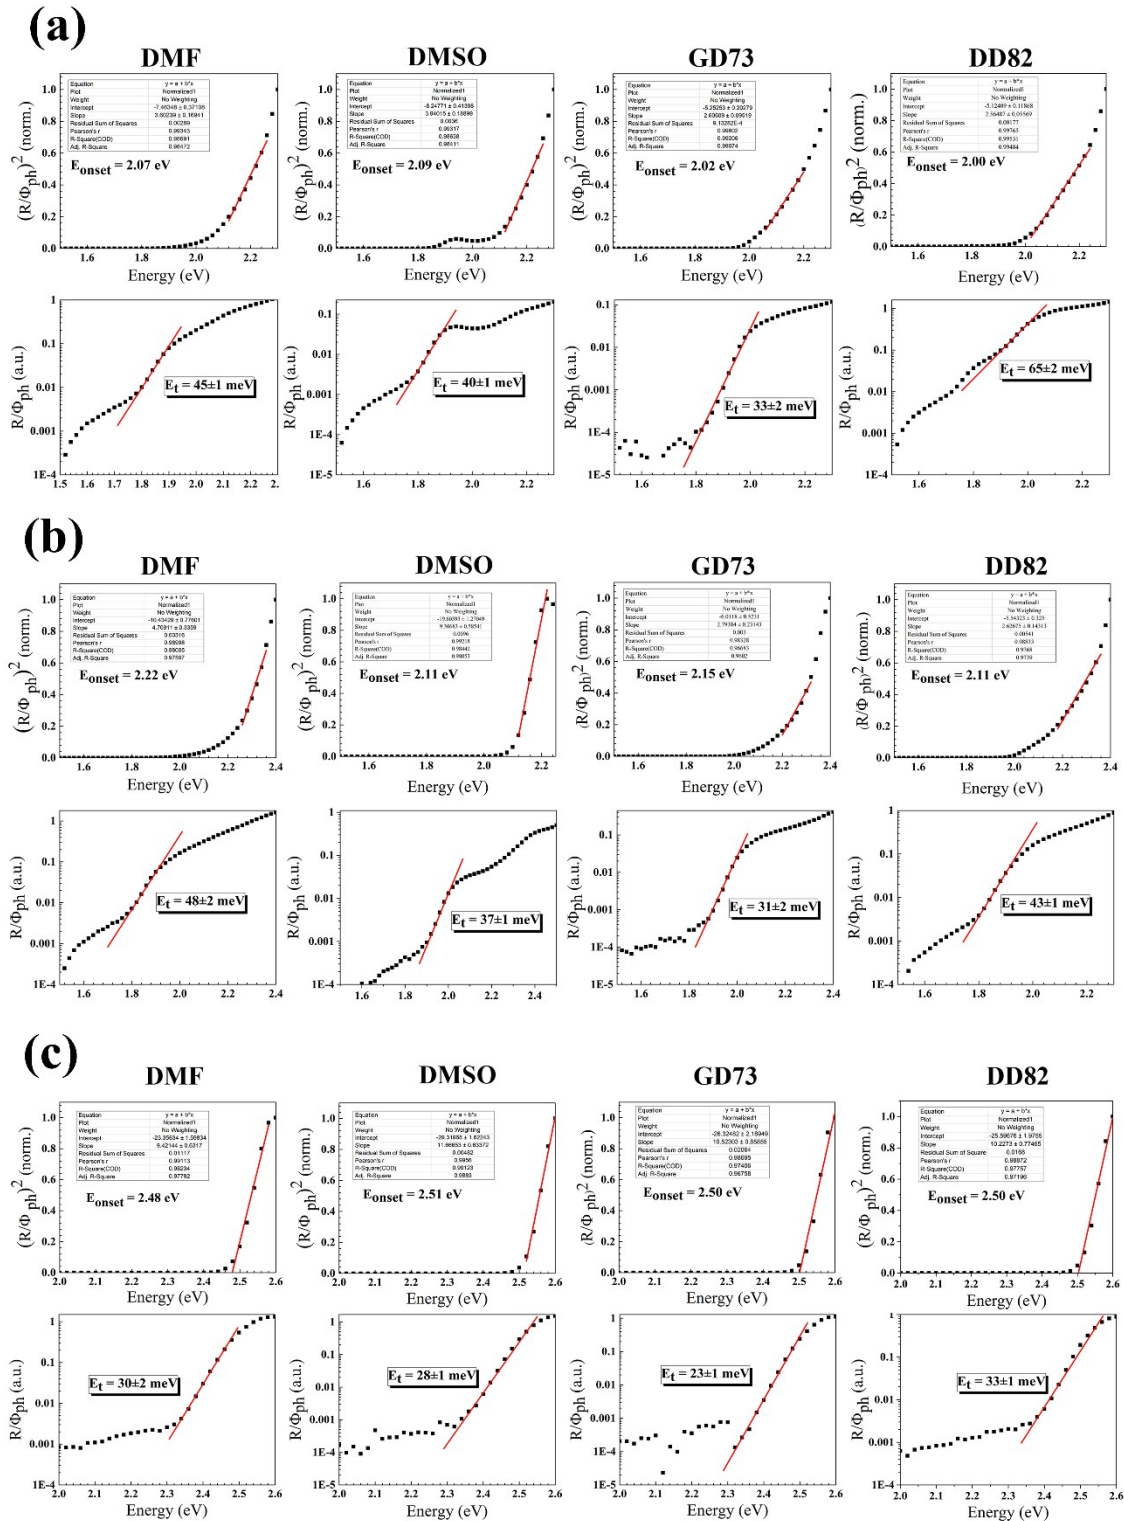

**Fig. S3.** Calculation of  $E_t$  and  $E_{onset}$  for  $(PEA)_2(MA)_{n-1}Pb_nI_{n+1}Br_{2n}$  perovskite thin films; (a) n5 (b) n3 (c) n1 from different types of solvent; DMF, DMSO, GBL:DMSO = 7:3, and DMF:DMSO = 8:2 from SPV spectra.

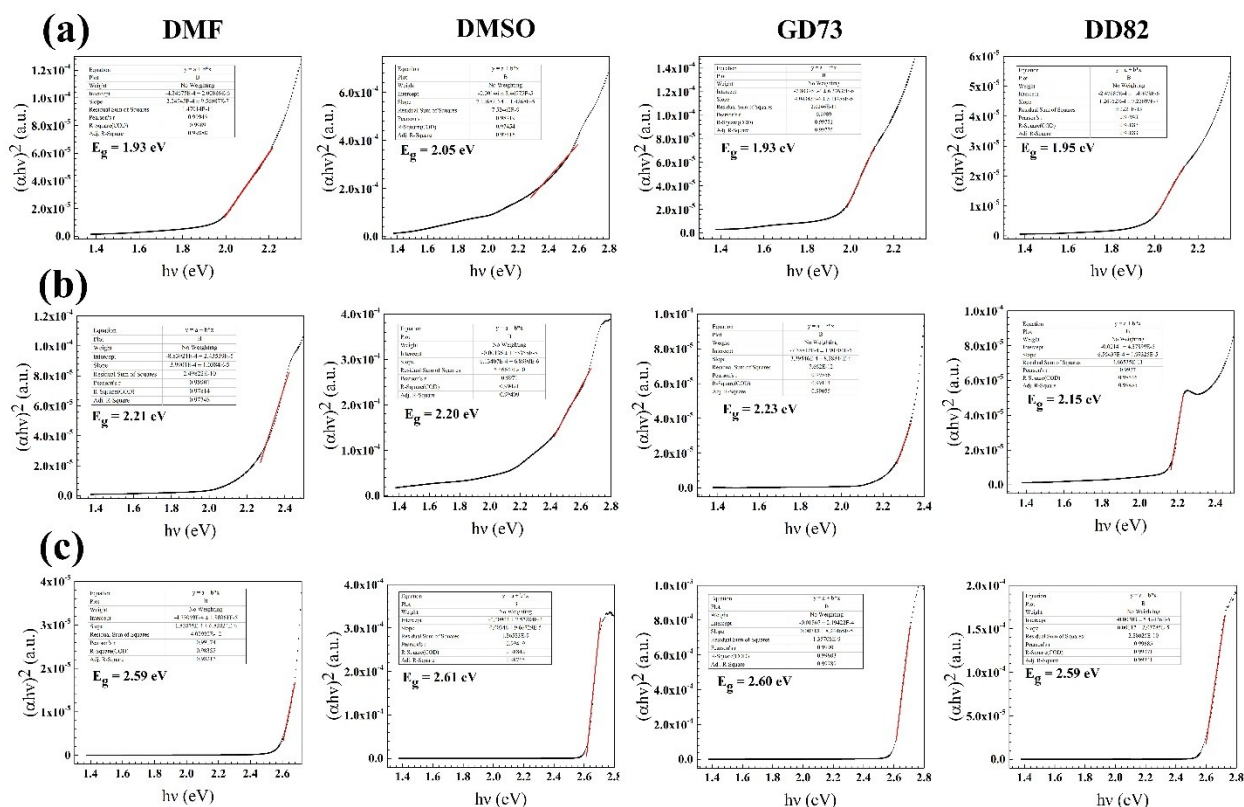

**Fig. S4.** Calculation of  $E_g$  for  $(\text{PEA})_2(\text{MA})_{n-1}\text{Pb}_n\text{I}_{n+1}\text{Br}_{2n}$  perovskite thin films; (a) n5 (b) n3 (c) n1 from different types of solvent; DMF, DMSO, GBL:DMSO = 7:3, and DMF:DMSO = 8:2 from UV absorption spectra.

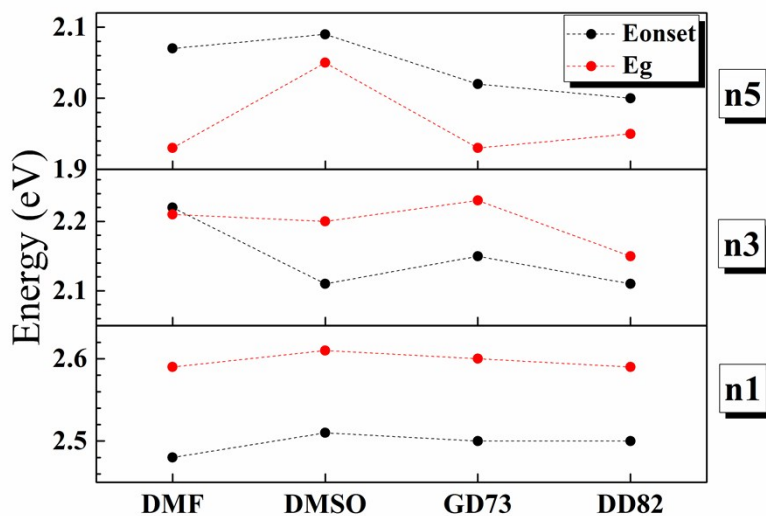

**Fig. S5.** Correlation between the optical band gap energy and onset energy for  $(\text{PEA})_2(\text{MA})_{n-1}\text{Pb}_n\text{I}_{n+1}\text{Br}_{2n}$  perovskite thin films from different types of solvent; DMF, DMSO, GBL:DMSO = 7:3, and DMF:DMSO = 8:2.

|                | n5 thickness (nm) | n3 thickness (nm) | n1 thickness (nm) |
|----------------|-------------------|-------------------|-------------------|
| DMF            | 1695 ± 52         | 1825 ± 77         | 3604 ± 23         |
| DMSO           | 629 ± 66          | 1050 ± 70         | 1400 ± 71         |
| GBL:DMSO = 7:3 | 358 ± 22          | 503 ± 24          | 790 ± 34          |
| DMF:DMSO = 8:2 | 1562 ± 45         | 1572 ± 75         | 2042 ± 73         |

**Table S1.** Thicknesses of  $(\text{PEA})_2(\text{MA})_{n-1}\text{Pb}_n\text{I}_{n+1}\text{Br}_{2n}$  perovskite films prepared in different solvents.
